# Supplementary material for: Computational identification of HCV neutralizing antibodies with a common HCDR3 disulfide bond motif in the antibody repertoires of infected individuals
Source: PubMed Central journal article supplement (PMC9177688; doi:10.1038/s41467-022-30865-9), 2022-06-08
Supplement: 41467_2022_30865_MOESM1_ESM.pdf [file 41467_2022_30865_MOESM1_ESM.pdf]

**Supplementary information:  
Computational identification of HCV neutralizing antibodies  
with a common HCDR3 disulfide bond motif in the antibody  
repertoires of infected individuals**

N. Bozhanova *et al.*

|        | HEPC3                                                              | HEPC74                                                | AR3A                                                  | AR3C                                                  | AR3X                                                  |
|--------|--------------------------------------------------------------------|-------------------------------------------------------|-------------------------------------------------------|-------------------------------------------------------|-------------------------------------------------------|
| HC11   | 32%<br>ARDGVR <del>Y</del> CGGGRCYNWFDP<br>AMEVPGFCRGGSCSGYMDV     | 35%<br>ARDLLKYCGGGNCHSLLVDP<br>AMEVPGFCRGGSC-SGYMDV   | 40%<br>VRPETPRYCSGGFCYGEFDN<br>-AMEVPGFCRGGSCSGYMDV   | 40%<br>VRSVTPRYCGGGFCYGEFDY<br>AMEV-PGFCRGGSCSGYMDV   | 52%<br>ARENKFRYCRGGSCYSGAFDM<br>AME-VPGFCRGGSC-SGYMDV |
| AR3X   | 52%<br>AR-DGVR <del>Y</del> CGGGRCYNW-FDP<br>ARENKFRYCRGGSCYSGAFDM | 43%<br>AR-DLLKYCGGGNCHSLLVDP<br>ARENKFRYCRGGSCYSGAFDM | 52%<br>VRPETPRYCSGGFCY-GEFDN<br>ARENKFRYCRGGSCYSGAFDM | 52%<br>VRSVTPRYCGGGFCY-GEFDY<br>ARENKFRYCRGGSCYSGAFDM |                                                       |
| AR3C   | 55%<br>AR-DGVR <del>Y</del> CGGGRCYNWFDP<br>VRSVTPRYCGGGFCYGEFDY   | 40%<br>ARDLL-KYCGGGNCHSLLVDP<br>VRSVTPRYCGGGFCYGEF-DY | 80%<br>VRPETPRYCSGGFCYGEFDN<br>VRSVTPRYCGGGFCYGEFDY   |                                                       |                                                       |
| AR3A   | 50%<br>AR-DGVR <del>Y</del> CGGGRCYNWFDP<br>VRPETPRYCSGGFCYGEFDN   | 35%<br>ARDLL-KYCGGGNCHSLLVDP<br>VRPETPRYCSGGFCYGEF-DN |                                                       |                                                       |                                                       |
| HEPC74 | 55%<br>ARDGVR <del>Y</del> CGGGRCYNWF-DP<br>ARDLLKYCGGGNCHSLLVDP   |                                                       |                                                       |                                                       |                                                       |

**Supplementary Figure 1. The pairwise similarity of HCDR3 loop sequences between six chosen E2 front layer-specific bNAbs.** Each cell shows an alignment of the amino acid sequences of the two corresponding HCDR3 loops (IMGT definition). Identical amino acids are colored blue. The percentage of identity is calculated as a ratio of the number of identical amino acids between the two sequences and the length of the longest loop in the pair. The only pair of Abs that fulfills the traditionally used 75-80% identity cutoff for HCDR3 loops in sibling search is highlighted with green.

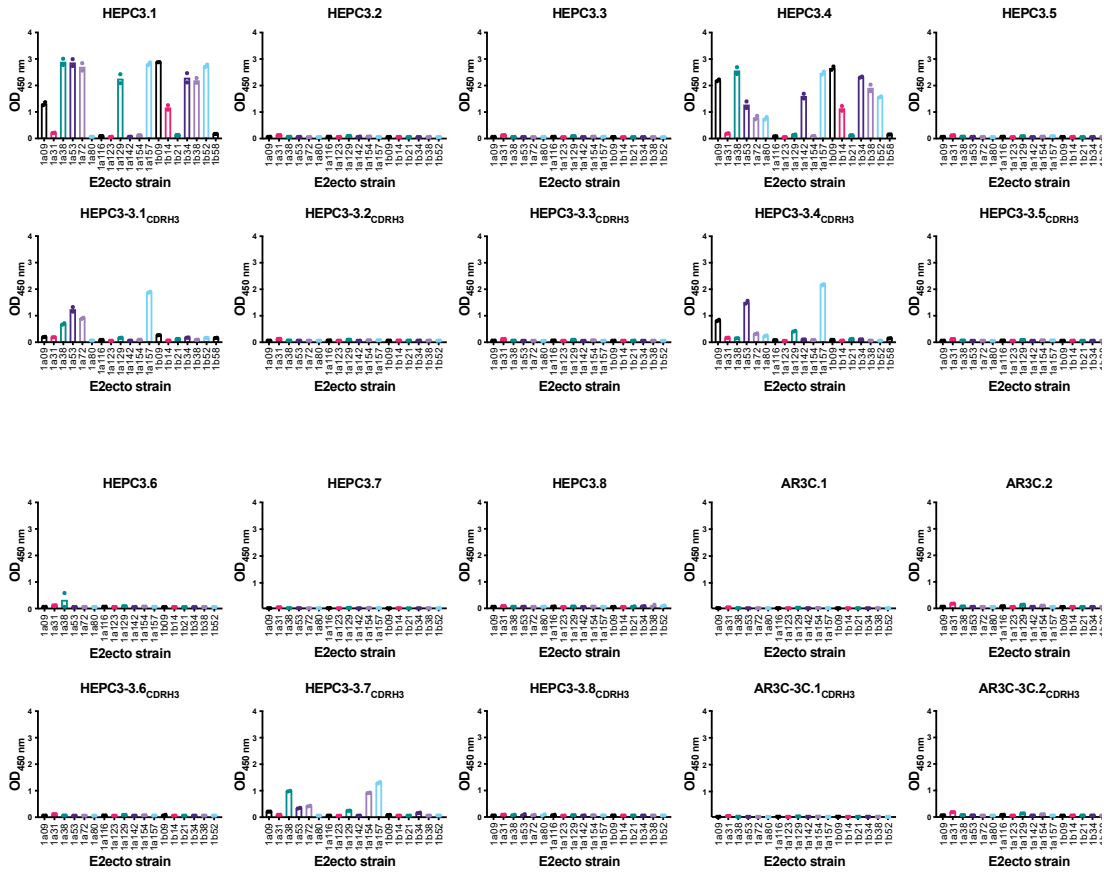

**Supplementary Figure 2. Binding of HEPC3- and AR3C-like Abs to a panel of genotype 1 E2 glycoproteins.** Data are presented as means of technical duplicates, and individual data points are indicated. Source data are provided in the Source Data file.

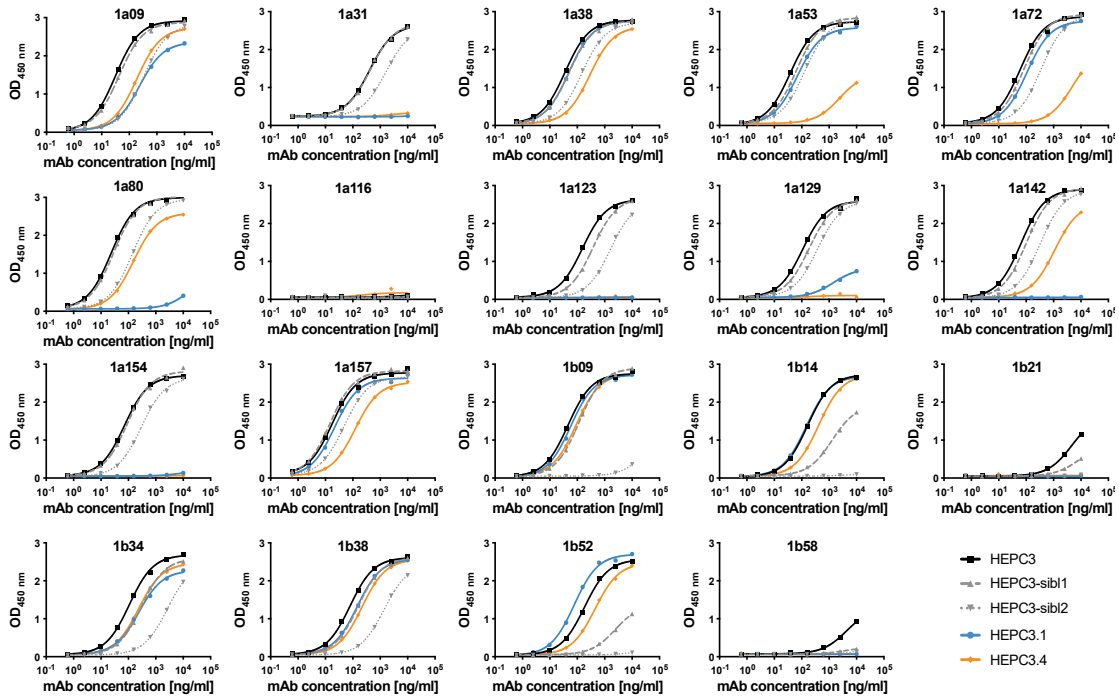

**Supplementary Figure 3. Binding of HEPC3.1, HEPC3.4, HEPC3-sib11, and HEPC3-sib12 Abs to a panel of 19 genotype 1 E2 glycoproteins.** Values shown are means of technical duplicates. One experiment representative of two independent experiments is shown. Source data are provided in the Source Data file.

```

HCDR1          HCDR2          HCDR3
HEPC3 QVQLVQSGAE VKPKGSSVKV SCKASGGLN SYEITMVRQA PGQGLEHWGG ITPIFET-TY AQKFGGRVTI TADESTSTY MELSSLRPED TAVVYCARDG V-RYCGGGR Y--NMFDPWG QGTLTVSS
Rand-VH_1 .....FS ..A.S.....I...G.AN.....A.....S.....EI P-G-.S..S..SAA
Rand-VH_2 .....FS ..A.S.....I...G.AN.....A.....S.....H ENG..S..S..-N
Rand-VH_3 .....FS ..A.S.....I...G.AN.....A.....S.....GT L-.S..S..ST
Rand-VH_4 .....FS ..T.S.....R I...LGIAN.....K...A.....S.....YR L-G..S..S..HN
Rand-VH_5 .....FS ..A.S.....I...G.AN.....A.....S.....AL L-.S..S..H
Rand-VH_6 .....FS T.A.S.....I.V.R.TN.....AF ..MN...S.....S L-E..S..G..-Q...L..P
Rand-VH_7 .....WA.....FS ..A.S.....I...G.AN.....A.....S.....L G-GL.S..S..-SGWGM.V...T
Rand-VH_8 .....EA.....Y.FT ..A.S.....I...G.AN.....A.....S.....QN S-.S..S..-S.D
Rand-VH_9 .....A.....FS ..A.S.....I...G.AN.....I...R..SD...G..VP R-.S..S..H--SG..Y
Rand-VH_10 .....WA.....FS ..A.S.....I...G.AN.....A.....S.....GS P--.S..S..SA...D

```

**Supplementary Figure 4. Alignment of the amino acid sequences of the heavy chain variable regions of bNAbs HEPC3 with ten Abs containing C-X-G-G-X-C HCDR3 motif randomly selected from the Ab repertoire of patients who spontaneously cleared HCV infection.**

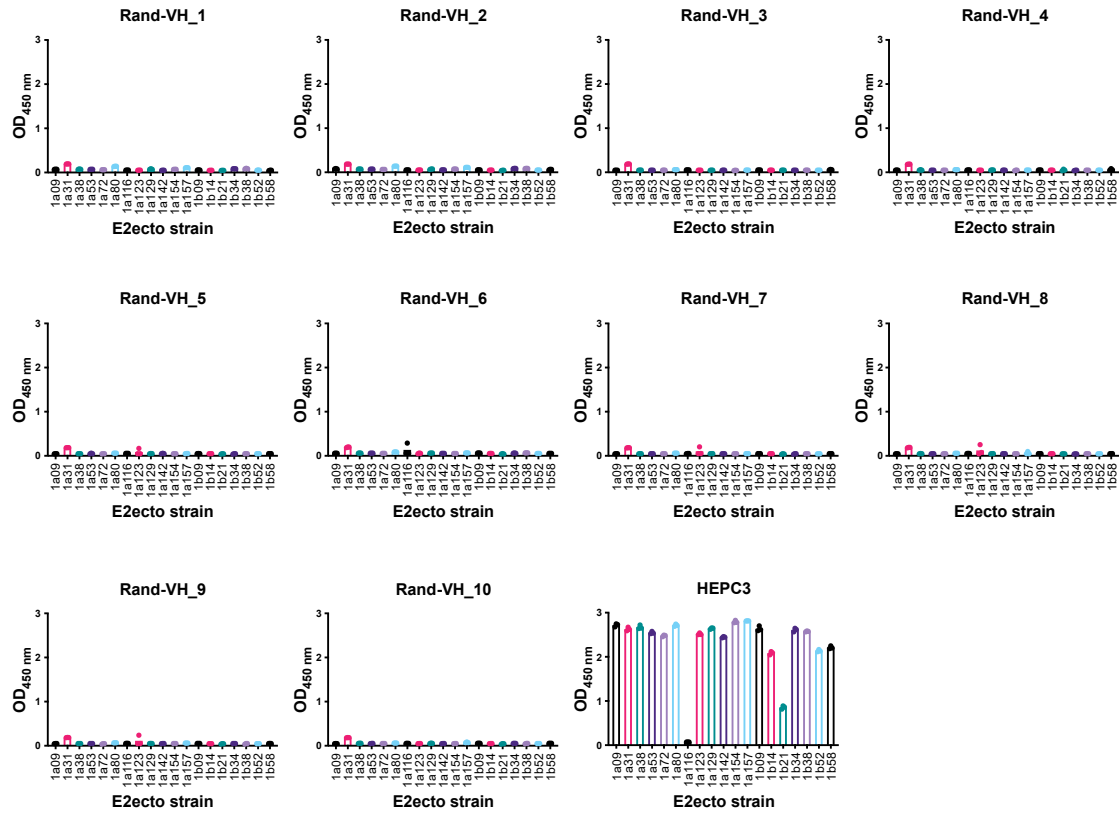

**Supplementary Figure 5. Binding of Abs containing C-X-G-G-X-C HCDR3 motif randomly selected from the Ab repertoire of patients who spontaneously cleared HCV infection to a panel of genotype 1 E2 glycoproteins. Data are presented as means of technical triplicates, and individual data points are indicated. Source data are provided in the Source Data file.**

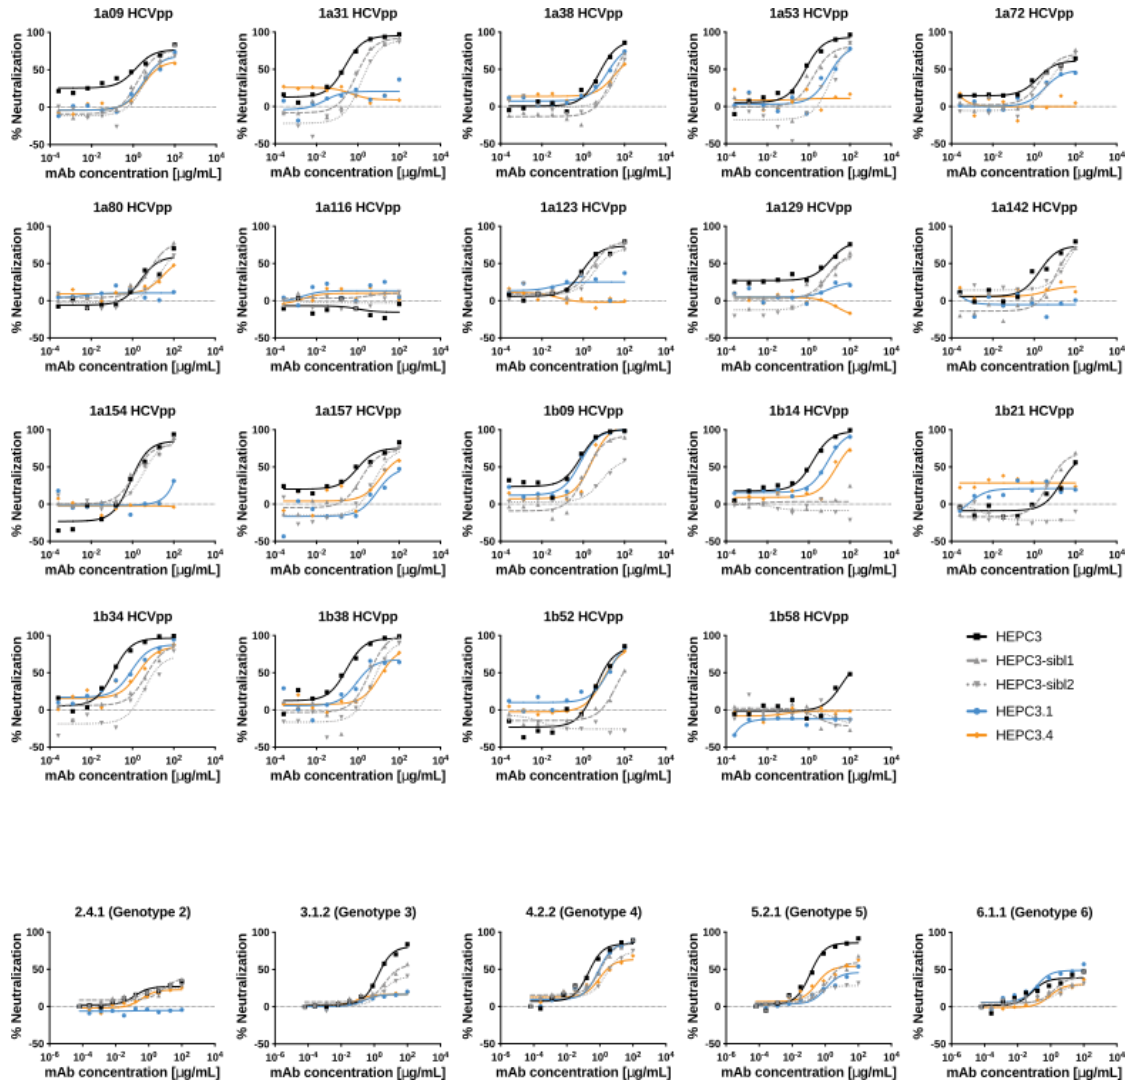

**Supplementary Figure 6. Neutralization activities of HEPC3.1, HEPC3.4, HEPC3-sib1, and HEPC3-sib2 Abs against a panel of genotype 1-6 HCVpp.** Values shown are means of technical duplicates. Source data are provided in the Source Data file.

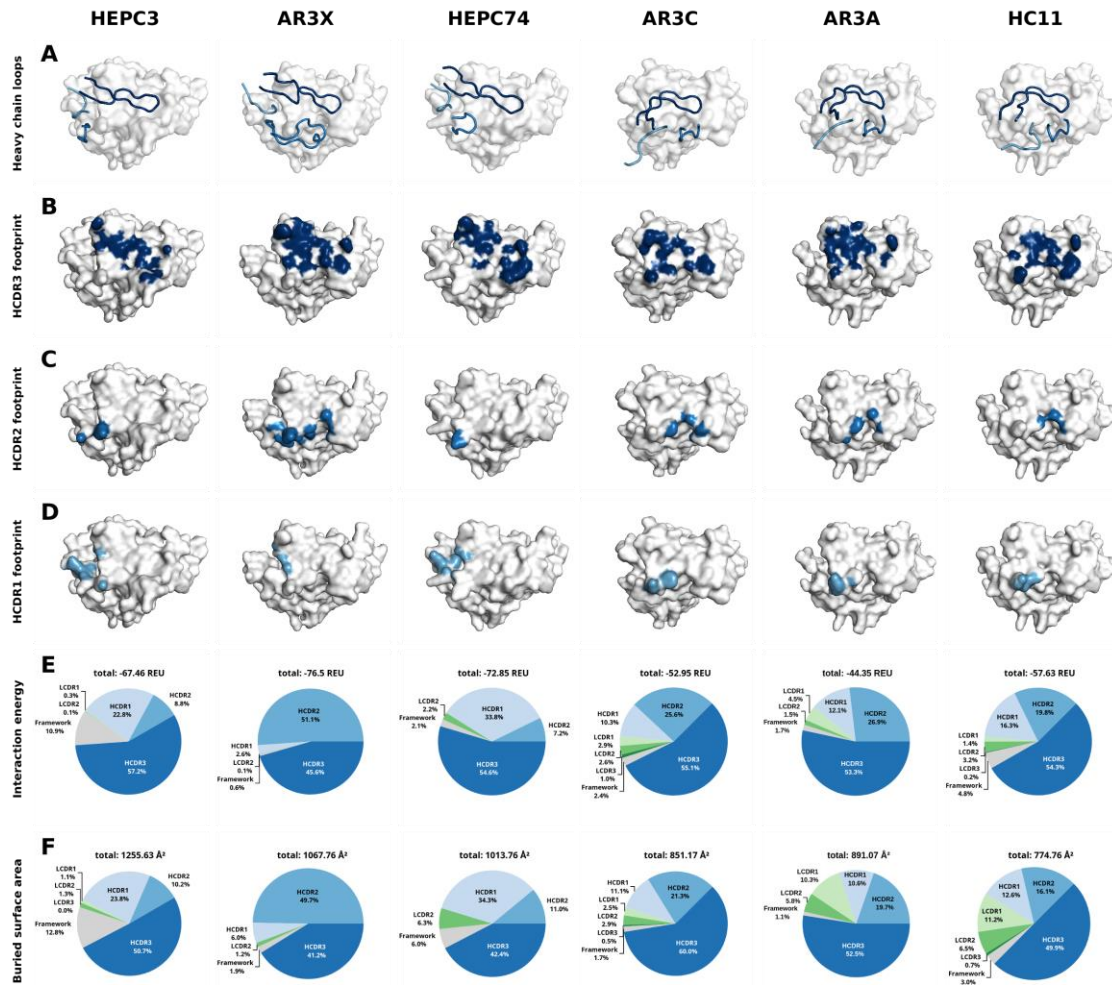

**Supplementary Figure 7. Summary of the Ab-antigen interactions of the straight (HEPC3, AR3X, HEPC74) and bent (AR3C, AR3A, HC11) HEPC bNAbs. (A).** Positions of the HCDR1, HCDR2, and HCDR3 loops of the Abs in the Ab-antigen complexes. The glycoprotein E2 is shown as a surface. The HCDR1, HCDR2, and HCDR3 loops are shown as light blue, blue, and dark blue cartoons, respectively. **(B-D)** Footprints of the HCDR1 (D), HCDR2 (C), and HCDR3 (B) loops. The glycoprotein E2 is shown as a surface. The antigen atoms located within 4 Å from any corresponding HCDR atom are colored. **(E-F)** Pie charts demonstrating relative contribution of different Ab parts (HCDR1, HCDR2, HCDR3, LCDR1, LCDR2, LCDR3, and framework) to antigen binding. **(E)** Decomposition of the Ab-antigen interaction energy calculated in Rosetta. **(F)** Relative contribution of different Ab parts to buried surface area. PDB IDs of the used structures: HEPC3: 6MEI, AR3X: 6URH, HEPC74: 6MEH, AR3C: 4MWE, AR3A: 6BKB, HC11: 6WO4.

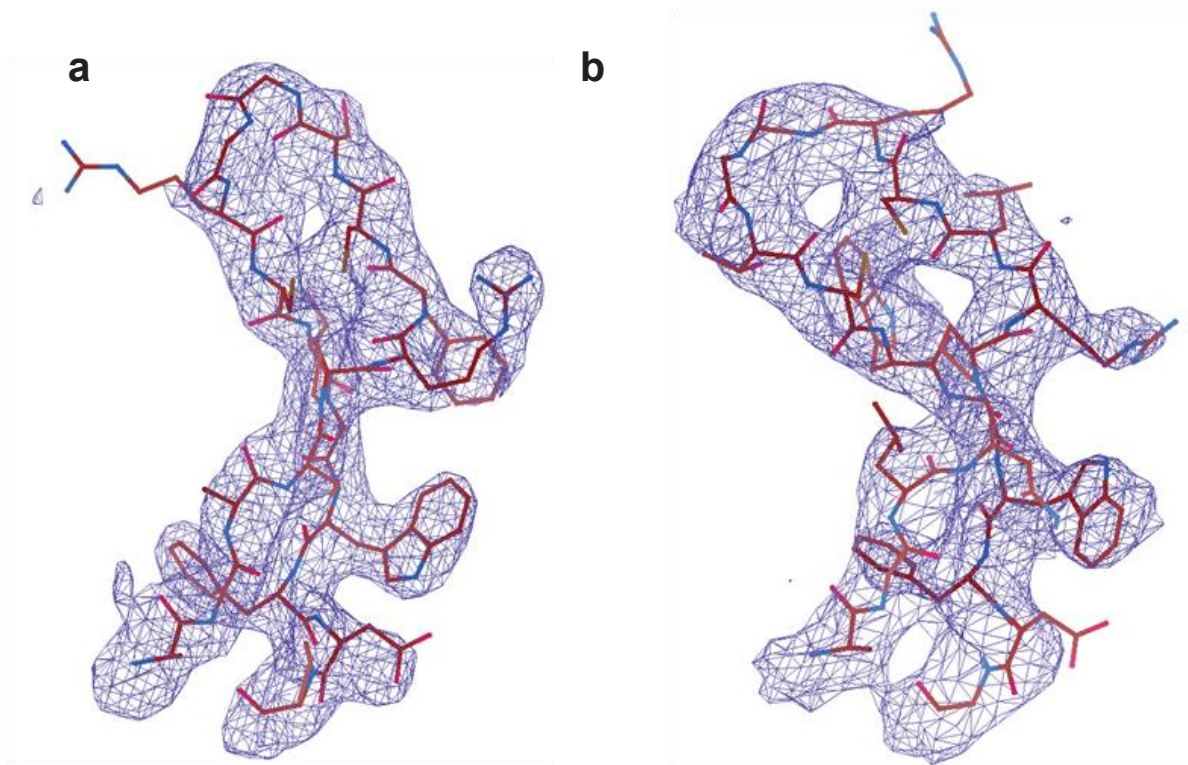

**Supplementary Figure 8. Close-up views of CDRH3 density maps for HEPC3.1 (a) and HEPC3.4 Fabs (b).** Blue mesh represents the 2Fo-Fc density map generated in Coot by masking 2Fo-Fc map outside the CDRH3 region. The resulting masked maps were contoured at  $0.37 \text{ e}/\text{\AA}^3$  (HEPC3.1) and  $0.42 \text{ e}/\text{\AA}^3$  (HEPC3.4).



**Supplementary Table 1. Primer sequence information**

| Step                  | Primer Name                                          | Primer Sequence                                                       |
|-----------------------|------------------------------------------------------|-----------------------------------------------------------------------|
| Reverse transcription | Human IgH RT primer with UMI                         | TTGGCACCCGAGAATTCCACTGHHHHHACAHHHHHACAHHH<br>HNCTTACCTGAGGAGACGGTGACC |
| Multiplex PCR         | 5' HEPC74-FR1                                        | CGTTCAGAGTTCTACAGTCCGACGATCGTCCTCGGTAAAGGT<br>CTCCTGCACG              |
|                       | 5' HEPC3-FR1                                         | CGTTCAGAGTTCTACAGTCCGACGATCGTCCTCGGTGAAGGT<br>CTCCTGCAAG              |
|                       | 3' Adapter step-out primer                           | ACTGGAGTTCCTTGGCACCCGAGAATTCCACTG                                     |
| Library preparation   | 5' Illumina Adapter Extension Primer                 | AATGATACGGCGACCACCGAGATCTACACGTTTCAGAGTTCTA<br>CAGTCCGACGATC          |
|                       | 3' Illumina Adapter Extension Primer w/ Sample Index | CAAGCAGAAGACGGCATAACGAGATXXXXXXGTGACTGGAGTT<br>CCTTGGCACCCG           |

**Supplementary Table 2. Donor C117 timepoint information**

| Timepoint ID | Timepoint Date | # PBMCs Used    |
|--------------|----------------|-----------------|
| U1           | 11/18/2004     | $1 \times 10^7$ |
| U2           | 2/10/2005      | $1 \times 10^7$ |
| U3           | 5/12/2005      | $1 \times 10^7$ |
| U4           | 11/2/2005      | $1 \times 10^7$ |

**Supplementary Table 3. Primer sequence information**

| Step            | Primer Name      | Primer Sequence           |
|-----------------|------------------|---------------------------|
| One-step RT-PCR | VH1-FWD-Primer   | GGCCTCAGTGAAGGTCTCCTGCAAG |
|                 | JH-RT-REV-Primer | CTTACCTGAGGAGACGGTGACC    |

**Supplementary Table 4. Summary of results of antibody gene repertoire sequencing**

| Run ID | Total reads | Unique productive reads | Unique clonotypes | Unique HCDR3s |
|--------|-------------|-------------------------|-------------------|---------------|
| 47     | 8,558,961   | 2,933,659               | 825,905           | 631,114       |
| 126    | 20,665      | 9,575                   | 9,158             | 4,106         |
| 127    | 22,326      | 5,585                   | 5,311             | 3,709         |

**Supplementary Table 5. Top HEPC3-like sequences and their ranks. The names of the tested sequences are specified in parentheses.**

| Total score-based P3SM        |        | Interface score-based P3SM    |        |
|-------------------------------|--------|-------------------------------|--------|
| ARDSLRYCSGGSCYRGMDV (HEPC3.7) | -42.97 | ATLHPRLCRGGTCWGWFD (HEPC3.4)  | -52.41 |
| ARDSLGYCSGGSCYRGMDV           | -40.56 | ARDRVRYCSGGSCYSAFDY           | -52.26 |
| ARDSLGYCSGGSCYRGMVV           | -39.92 | AGALPRFCSSGGRCSGWFD (HEPC3.1) | -51.81 |
| ARDRVRYCSGGSCYSAFDY           | -39.92 | ASRRRYCSGGSCPLSDDI            | -51.73 |
| ARDRTEDCSGGSCYSALDY           | -39.29 | <b>HEPC3</b>                  | -50.79 |
| ARSLARYCSGGSCYDGMVD (HEPC3.2) | -39.26 | ATIEWGYCSGGSCYRPHDY (HEPC3.8) | -50.53 |
| ARWERDYCSGGSCYYGMDV           | -39.04 | ARVQRYCSGGSCPHAFDI            | -50.53 |
| ARDGLGYCSGGSCYSGLDY           | -38.89 | AALMDRYCSGGSCYDAFDI           | -50.26 |
| ARYLPRYCSGGSCYNYFDY (HEPC3.5) | -38.23 | ARVPRRYCSGGSCHSGFDY           | -49.67 |
| AALEALYCSGGSCYSNFDY           | -38.22 | ARDPVRYCSGGSCPYFDY (HEPC3.6)  | -49.66 |
| ARWERDYCSGGSCYGGMDV           | -37.98 | AIDRAAYCSGGSCLLGMDV           | -49.56 |
| ARVQLGYCSGGSCYYGMDV           | -37.9  | ARDSLRYCSGGSCYRGMDV (HEPC3.7) | -49.56 |
| ARTYPGYCSGGSCYNGMDV           | -37.39 | ARYLPRYCSGGSCYNYFDY (HEPC3.5) | -49.37 |
| ATDFLGYSGGSCYPYSDY            | -37.35 | ARSLARYCSGGSCYDGMVD (HEPC3.2) | -49.33 |
| <b>HEPC3</b>                  | -37.1  | ARDRAAYCSGGSCLLGMDV           | -49.32 |
| ARAKTTYCSGGSCYPYFDY           | -36.92 | ARVQQRCSGGSCPDAFDI            | -49.29 |
| ARDSLGYCSGGSCSYGMDV           | -36.91 | ARERMGYCSGGSCLYFDY            | -49.14 |
| ARDLPHRCSGGSCYGYFDL           | -36.68 | ASDRGTYCSGGDCYGGFDL (HEPC3.3) | -49.11 |
| ARWGRDYCSGGSCYGGMDV           | -36.66 | ARTYPGYCSGGSCYNGMDV           | -49.09 |
| ARDEVGYCSGGSCYNWLP            | -36.64 | ATGFLGYCSGGSCQPFDY            | -49.03 |
| ATGSLGGCSGGSCYTMDV            | -36.51 | ASSPLGYCSGGSCFADFID           | -48.96 |

**Supplementary Table 6. Top AR3C-like sequences and their ranks. The names of the tested sequences are specified in parentheses.**

| Total score-based P3SM        |        | Interface score-based P3SM   |        |
|-------------------------------|--------|------------------------------|--------|
| ARSQISNYCSGGSCYSASDY          | -36.41 | ARVPTPRYCSGGSCHNAFDI         | -37.56 |
| <b>AR3C</b>                   | -36.1  | ARAGYPGYCSGGSCFNWFD (AR3C.1) | -37.12 |
| AKNQHPGYCSGGSCYSSFDY (AR3C.2) | -35.47 | ARVRYINNCSSGGSCYFFDY         | -36.93 |
| ARVAVMGYCSGGSCYSGFDY          | -34.11 | AREGYDYDCSSGCHNWFD           | -36.54 |
| ARDGDIIGYCSGGSCYSGLDY         | -34.04 | AKNQHPGYCSGGSCYSSFDY         | -36.53 |
| ARDASPGYCSGGSCYSTLDY          | -33.91 | <b>AR3C</b>                  | -36.37 |
| ARDRDTSYCSGGSCYSYFDY          | -33.51 | ARVRRMRDCGGSCYSWFD           | -36.23 |
| ARDVSPGYCSGGSCYSTLDY          | -33.42 | AREGYDYDCSSGCHNWSDP          | -36.12 |
| AREGTGGYCSGGSCYSGMDV          | -33.34 | ARGPQTRYCSGGSCADAFDI         | -36.07 |
| ARDVSPGYCSGGSCYSTLYY          | -32.62 | AERYFGRYCSGGSCYSPFDY         | -35.9  |

**Supplementary Table 7. Data collection and refinement statistics for HEPC3.1 and HEPC3.4 Fabs structures.**

|                                   | HEPC3.1                     | HEPC3.4                    |
|-----------------------------------|-----------------------------|----------------------------|
| <b>Data collection</b>            |                             |                            |
| Wavelength (Å)                    | 0.98                        | 0.98                       |
| Resolution range (Å)              | 45.87 - 2.79 (2.89 - 2.79)* | 79.70 - 3.30 (3.42 - 3.30) |
| Space group                       | I2 <sub>1</sub> 3           | R32                        |
| Cell, Å (a, b, c)                 | 171.61, 171.61, 171.61      | 263.79, 263.79, 207.09     |
| Angles (α, β, γ)                  | 90, 90, 90                  | 90, 90, 120                |
| Total reflections                 | 348,624 (27,662)            | 386,153 (37,296)           |
| Unique reflections                | 21,030 (2,032)              | 41,569 (4,124)             |
| Multiplicity                      | 16.6 (13.6)                 | 9.3 (9.0)                  |
| Completeness (%)                  | 97.2 (76.6)                 | 99.9 (99.9)                |
| I/σI                              | 8.93 (0.33)                 | 10.09 (0.87)               |
| Wilson B-factor (Å <sup>2</sup> ) | 95.23                       | 133.7                      |
| R <sub>merge</sub>                | 0.22 (10.2)                 | 0.14 (2.86)                |
| R <sub>pim</sub>                  | 0.05 (2.78)                 | 0.05 (1.01)                |
| CC <sub>1/2</sub>                 | 1.00 (0.22)                 | 1.00 (0.48)                |
| <b>Refinement statistics</b>      |                             |                            |
| R <sub>work</sub>                 | 21.16                       | 21.46                      |
| R <sub>free</sub>                 | 24.39                       | 26.04                      |
| Number of atoms                   | 3,254                       | 9,368                      |
| Protein                           | 3,254                       | 9,368                      |
| Ligands                           |                             |                            |
| Solvent                           |                             |                            |
| Protein residues                  | 433                         | 1,239                      |
| R.m.s deviations                  |                             |                            |
| Bond lengths (Å)                  | 0.005                       | 0.02                       |
| Bond angles (°)                   | 1.06                        | 1.58                       |
| Clashscore                        | 8.4                         | 18.48                      |
| Average B-factor                  | 94.69                       | 187.85                     |

\*Numbers in parentheses correspond to the highest resolution shell
